# Supplementary material
Source: PubMed Central journal article supplement (PMC3454880)
Supplement: supp_112.142372_142372SI.pdf [file supp_112.142372_142372SI.pdf]

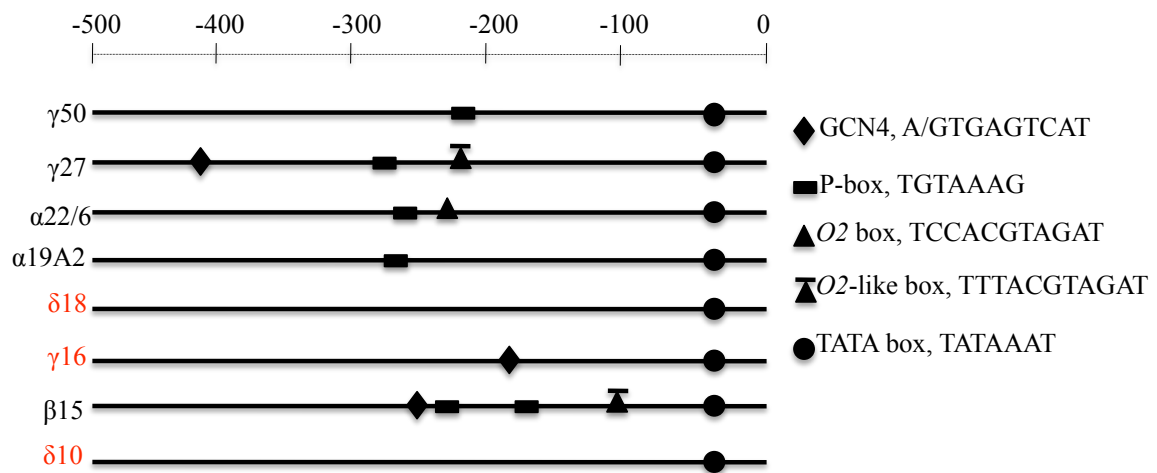

**Figure S1** Cis-elements in zein-gene promoters.

```

ZM27  --AAAAATAA-AATAGGCCGGACAG--GACAAAAATCCTTGACGTGTAAGTAAATTTAC -267
SB27  GTAAAAACAA-AGTAGGCCGGAGAGAGGACAATAATCCTTGACGTGTAAGTGAATTTAC -250
ZM16  --AAAAGCAAGAGTAGGACGGAGAG--GAAAATAATCCTTGACG-----ACGTGC -183
      ***** ** * ***** ** ** ** ***** ** ** * * *

ZM27  AACAAAAAAAAGCCATATGTCAAGCTAAATCTAATTCGTTTACGTAGAT--CAACAACC -209
SB27  AA-----AGCCATATATCAATTTATATCTAATTCGTTTCATGTAGATATCAACAACC -198
ZM16  A-----CATGAGCCA----- -173
      *           ***      **

ZM27  TGTAGAAGGCAACAAAAGCTGAGCCACGCAGAAGTACAGAATGATTCAGATGAACCATCG -149
SB27  TGTAAAAGGCAACAAA-TTGAGCCACGCAAAATTACA-AGTGAGTCCAAATPAAACCTC- -141
ZM16  -----CACGCAAGAGTACTGAATAAATCCAGATGAACCTCC -136
      ***** * *** * * * ***** ** ***** **

ZM27  ACGTGCTACGTAAAGA-GAGTGACGAGTCATATACATTTGGCAAGAAACCATGAAGCTGC -90
SB27  ACATGCTACATAAAAAGTGAATGATGAGTCATGTATATCTGGCAAGAAACTGTAGA---AG -84
ZM16  AAAAG-TGAATGAGAT-GAGTCATG-----TATACATTTGGCAAGAAACCGTAGA---AG -86
      * * * * * * * * * * * * * * * * * * * * * * * * * * *

ZM27  CTACAGCCGTCTCGGTGGCATAAAGAACACAAGAAATTGTGTTAATTAATCAAAGCTATAAA -30
SB27  CTACAGTCATC--GGTAGCAAAGAAACACAAGAAAATGTGCTAATAA----AAGCTATAAA -30
ZM16  CTACCGCCATC--GATTCATCATAGAAGAAGAAATTGTGGTAATCGG--AAAGCTATAAA -30
      ***** * * * * * * * * * * * * * * * * * * * * * * * * * * *
                                +1 Transcription Start

ZM27  ATAACGCTCGCATGCCTGTGCACTTCTCCATCACCACCACTGGGTCT---TCAGACCATT 28
SB27  ATAACCCCTCGTACGCCTATGCACATCTCCATCACCACCACTGGTCTTCATTCAGCCTATT 31
ZM16  ATAACCGCTCGTATGCCTATGCACCTTCTCCACCACCACCACTGGACGTCAGCCTAGCAATT 31

```

**Figure S2** Alignment of the 27- and 16-kDa  $\gamma$ -zein and 27-kDa  $\gamma$ -kafirin promoters.

1 2 3 4 5 6  
 C A C G G T G A G T C A T G C C G A G A T C A T  
 7 8 9 10 11 12  
 A C T C A T C T G A T A T A C A T G C T T A C A  
 13 14 15 16 17 18 19  
 G C T C A C A A G A C A T T A C A A A C A A C T  
 20 21 22 23  
 C A T A T T G C A T T A C A A A G A T C G T T T  
 24 25 26 27  
 C A T G A A A A T A A A A T A G G C C G G A C  
 28 29 30 31  
 A G G A C A A A A A T C C T T G A C G T G T A A  
 32 33 34  
 A G T A A A T T T A C A A C A A A A A A A A G C  
 35 36 37 38 39  
 C A T A T G T C A A G C T A A A T C T A A T T C  
 40 41 42 43 44  
 G T T T T A C G T A G A T C A A C A A C C T G T  
 45 46 47 48 49 50  
 A G A A G G C A A C A A A A C T G A G C C A C G  
 51 52 53 54  
 C A G A A G T A C A G A A T G A T T C C A G A T  
 55 56 57 58 59 60  
 G A A C C A T C G A C G T G C T A C G T A A A G  
 61 62 63  
 A G A G T G A C G A G T C A T A T A C A T T T G  
 64 65 66 67 68 69 70  
 G C A A G A A A C C A T G A A G C T G C C T A C  
 71 72 73 74 75 76  
 A G C C G T C T C G G T G G C A T A A G A A C A  
 77 78  
 C A A G A A A T T G T G T T A A T T A A T C A A  
 79 80 81 82 83 84 85  
 A G C T A T A A A T A A C G C T C G C A T G C C  
 86 87 88 89 90  
 T G T G C A C T T C T C C A (Transcription Start Site)

**Figure S3** Cytosines in the 27-kDa  $\gamma$ -zein promoter. The 421-bp fragment immediately upstream of the transcription start site contains 90 cytosines, covering the P-box, O2-like box and TATA box. P-box, "ACGT" core motif and TATA box are shaded. The cytosine positions indicated in Figs. 4a and S6d are numbered in the sequence.

|               |                                                                      |  |
|---------------|----------------------------------------------------------------------|--|
|               | 1 2 3 4                                                              |  |
| <b>Zp22/6</b> | <b>TGTGTAAAGGTGAAGAGATCTTGCATGTCATTTC</b>                            |  |
| azs22.11      | TGTGTAAAGGTGAAGAGATGATGCATGTCAT-C                                    |  |
| azs22.12      | TGTGTAAAGGTGAAGAGATGATGCATGTCAT-C                                    |  |
| azs22.13      | TGTGCAAAGGTGAAGAGATCATGCATGTCATTTC                                   |  |
| azs22.4       | TGTGTAAAGGTGAAGAGATCATGCATGTCATTTC                                   |  |
| azs22.1       | TGTGTAAAGGTGAAGCGATCATGCATGTCATTTC                                   |  |
| azs22.3       | TGTGTAAAGGTGAAGAGATCATGCATGTCATTTC                                   |  |
| azs22.5       | TGTGTAAAGGTGAAGAGATCATGCATGTCATTTC                                   |  |
| azs22.19      | TGTGTAAAGGTGAAGAGATCATGCATGTCATTTC                                   |  |
| azs22.7       | TGTGTAAAGGTGAAGAGATCATGCATGTCATTTC                                   |  |
| azs22.8       | TGTGTAAAGGTGAAGAGATCATGCATGTCATTTC                                   |  |
| azs22.2       | TGTGTAAAGGTGAAGCGATCATGCATGTCATTTC                                   |  |
| azs22.20      | TGTGTAAAGGTGAAGAGATCATGCATTTCATTTC                                   |  |
| azs22.6       | TGTTTAAAGGTGAAGAGATCATGCATGTCATTTC                                   |  |
| azs22.9       | TGTGTAAAGGTGAAGAGATCATGCATGTCATTTC                                   |  |
| azs22.16      | TGTGTAAAGGTGAAGAGATCATGCATGTCATTTC                                   |  |
|               | 5 6 7 8 9 10                                                         |  |
| <b>Zp22/6</b> | <b>CACGTAGAT-AAAAAGAATGCATATATAAAAAATGGCACATTTTCTTGTAGGTAGTGGAAA</b> |  |
| azs22.11      | CAAGTATATGAAAAAT-AATTCCTATA-GAAAAATGACACTTTTTCTTATAGGTAGTGGAAA       |  |
| azs22.12      | CAAGTATATGAAAAAG-AATTCCTATA-GAAAAATGACAATTTTTCTTGTAGGTAATGGAAA       |  |
| azs22.13      | CTCATGTATGAAAAAG-AATTCCTATA-GAAAAATGACGAATTTTTCTTGTAGGTAGTGGAAA      |  |
| azs22.4       | CACGTAGATGAAAA--AATTCCTATAAAAAATGACACCTTTTTCTTGTAGGTAGTGGAAA         |  |
| azs22.1       | CACGTAGATGAAAAAATTCCTATAAAAAATGACAATTTTTCTTGTAGGTAGTGGAAA            |  |
| azs22.3       | CACGTAGATGAAAAAG-AATTCCTATAAAAA-TGACACCTTTTTCTTGTAGGTAGTGGAAA        |  |
| azs22.5       | CACGTAGATGAAAAAG-AATTCCTATAAAAA-TGACACCTTTTTCTTGTAGGTAGTGGAAA        |  |
| azs22.19      | CACGTAGATGAAAAAG-AATTCCTATAAAAA-TGACACCTTTTTCTTGTAGGTAGTGGAAA        |  |
| azs22.7       | CACGTAGATGAAAAAG-AATTCCTATAAAAA-TGACACCTTTTTCTTGTAGGTAGTGGAAA        |  |
| azs22.8       | CACGTAGATGAAAAAG-AATTCCTATAAAAA-TGACACCTTTTTCTTGTAGGTAGTGGAAA        |  |
| azs22.2       | CACATAGATTAATAAAA-AAATCCTATATAAAAAATGACAATTTTTCTTGTAGGTAGTGGAAA      |  |
| azs22.20      | CACGTAGATAAAAAAG-AGTTCCTATAAAGAATGGCACATTTTCTTGTAGGTAGTGGAAA         |  |
| azs22.6       | CACGTAGATGAAAAAG-AATTCCTATAAAAA-TGACACATTTTCTTGTAGGTAGTGGAAA         |  |
| azs22.9       | CACGTAGATAAAAAAG-AATGCCTATAAAAAATGGCACATTTTCTTGTAGGTAGTGGAAA         |  |
| azs22.16      | CACATAAATGAAAAAG-AATTCCTATAAAAAATGACATGTTTTGTGTAGGTAGTGGAAA          |  |
|               | 11 1213 14 1516 1718 19 20                                           |  |
| <b>Zp22/6</b> | <b>GTATCTTTCCAGCTAAGACC----ATATAATCCGATAAAGGTGATAACTAAATGTCGAAA</b>  |  |
| azs22.11      | CTATCTTTCTA-----TATAATCCGATGAAACCGATAACTAAATGTCGAAA                  |  |
| azs22.12      | CTAGCTTTCCAGCAAAGACCA----TATAATCTGATGAAACTGATAACCAAATGTCGAAA         |  |
| azs22.13      | CTATCTTTATAGCAAAGTCCA----TATAATCATATGAAACTGATGACTAAATGTCAAAA         |  |
| azs22.4       | GTACCTTTCCAGCAAAGATCATATATATAATCCGATAAAGCTGAAAACTAAATGTCGAAA         |  |
| azs22.1       | CTATCTTTCTAGCAAAGACCATATATATAATCCGATAAAGCCGATAACTAAATGTCGAAA         |  |
| azs22.3       | GTATCTTTCCAGCAAAGACCATATA----ATCCGATAAAGTTGATAACTAAATGTCAAAA         |  |
| azs22.5       | GTATCTTTCCAGCAAAGACCATATA----ATCCAATAAAGTTGATAACTAAATGTCGAAA         |  |
| azs22.19      | GTATCTTTCCAGCAAAGACCATATA----ATCCGATAAAGTTGATAACTAAATGTCAAAA         |  |
| azs22.7       | GTATCTTTCCAGCAAAGACCATATA----ATCCGATAAAGTTGATAACTAAATGTCGAAA         |  |
| azs22.8       | GTATCTTTCCAGCAAATACCATATA----ATCCGATAAAGCCGATAACTAAATGTCGAAA         |  |
| azs22.2       | GTATCTTTCCAGCAAAGACTATATATAATCCGATAAAGCCGATAACTAAATGTCAAAA           |  |
| azs22.20      | GTATCTTTCCAGCAAATACCATATA----ATCCGATAAAGATGATAACTAAATGTCGAAA         |  |
| azs22.6       | GTATCTTTCCAGCAAAGACTATA----ATCCGATAAAGTTGATAACTAAATGTCGAAA           |  |
| azs22.9       | GTATCTTTCCAGCAAAGACCATATA----ATCCGATAAAGCTGATAACTAAATGTCGAAA         |  |
| azs22.16      | TTATCTTTCCAGCAAAGACCATATA----ATCCGATAAAGCTGATAACTAAATGTCAAAA         |  |
|               | 21 2223 24 25 2627 28 29                                             |  |
| <b>Zp22/6</b> | <b>TCGAGTAGATGCCATATCATCTATACCTTATCTGTTGTTGG--AAAAAAGACAAAAT</b>     |  |
| azs22.11      | TTGAGTAGGTGCCATATCATCGATAGCTTATCTATTGTTTGGC--AAAA--GACAAAAT          |  |
| azs22.12      | TTGAGTAGGTGCCATATCATCTGATAGCTTATCTATTGTTTGGC--AAAA--GATAAAAT         |  |
| azs22.13      | TTGAGTAGGTGCCATATCATCTATAGCTTATCCATTGTTGGGA--AAAA--TACAAAAT          |  |
| azs22.4       | TCGAGTAGATGCCATATCATCTATACCTTATCTCTTGTGGGA--AAAA--GACAAAAC           |  |
| azs22.1       | TCGAGTAGATGCCATATCATCTATACCTTATCTGTTGTTGG--AAAA--GACAAAAT            |  |
| azs22.3       | TAGAGTAGATGCCATATCATATATACCTTATCTGTTGTTGGGA--AAAAAAGACTAAAT          |  |
| azs22.5       | TAGAGTAGATGCCATATCATTTTATACCTTATCTGTTGTTGGGA--AAAAA-GACTAAAT         |  |

```

azs22.19 TAGAGTAGATGCCATATCATCTATACCTTATCTGTTGTTTGGGA--AAAA---GACTAAAT
azs22.7 TAGAGTAGATGCCATATCATCTATACCTTATCTGTTGTTTGGGA--AAAA---GACTAAAT
azs22.8 TCGAGTAGATGCCATATCATCTATACCTTATCTGTTGTTTGGGA--AAAA---GACAAAAAT
azs22.2 TCGAGTAGATGCCATATCATCTATACCTTATCTGTTGTTTGGGA--AAAA---GACAAAAAT
azs22.20 TCGAGTAGATGCCATATCATCTATACCTTATCTGTTGTTTGGGA--AAAA---GACAAAAAT
azs22.6 AAGAGTAGATGCCATATCATCTATACCTTATCTGTTGTTTGGGA--AAAA---GACTAACT
azs22.9 TCGAGTAGATGCCATATCATCTATACCTTATCTGTTGTTTGGAAAAAAGACAAAAAT
azs22.16 TCGAGTAAGTGCCATATCATCTATACCTTATCTGTTGTTTGGGA--AAAA---GACAAAAAT

3031 32333435 36373839 40
Zp22/6 CCAAAAAA-TTTATAT----GAGATCTCACCTATATAAAATAGCGCCCAAATCAGTAGTTA
azs22.11 CCAATATATATATATAT----GAGATCTCACATGTATGAATATCTCCCAAATCAGTAGTTA
azs22.12 CCAATATATATATATATATGAGATCTCACCTATATAAAATATCTCCCAAATCAGTAGTTA
azs22.13 CCAAAAA-ATATATAT----GAGACCTCACCTGTATATAAACCACCAAATCAGTAGTTA
azs22.4 CAAAAA--TATTTAT----GAGGTCCTCACTTGTATAAAATAGCTCCCAAATCAGTAGTTA
azs22.1 CCAAAAA-ATATATAT----GAGATCTCACTTGTATGAATAGCTCCCAAATCAGTAATTA
azs22.3 CCCAAAA-ATATATAT----GAGATCTCACTTGTATAAAATAGCTCCCAAATTAGTAGTTA
azs22.5 CC--AAA-ATATATAT----GACATCTCACTTGTATAAAATAGCTCCCAAATCAGCAGTTA
azs22.19 CCAAAAA-ATATATAT----GAGATCTCACTTGTATAAAATAGCTCCCAAATCAGTAGTTA
azs22.7 CCAAAAAATATATATAT----AAGATCTCACTTGTATAAAATAGCTCCCAAATTAGTAGTTA
azs22.8 CCAAAAA-ATATATTT----GAGACCTCACCTGTATAAAATAGCTCCCAAATCAGTAGTTA
azs22.2 CCAAAAAAATATATAT----GAGATCTCACTTGTATAAAATAGCTCCCAAATCAGTAGTTA
azs22.20 CCAACAA-AAATATTC----GAGACCTCACCTATATAAAATAGCTCCCATATCAGTAGTTA
azs22.6 ACAAAAA-ATATATAT----GAGATCTCACTTGTATAAAATAGCTCCCAAATCAGTAGTTA
azs22.9 CCAAAAAAATATATAA----GAGATCTCACCTATATAAAATAGCTCTGAAATCAGTAGTTA
azs22.16 CCAAAAAAATATAT----GAGATCTCACATGTATAAAATAGCTCCCAAATCAGTAGTTA

4142
Zp22/6 ATCCA
azs22.11 ATTCA
azs22.12 ATCCA
azs22.13 ATTCA
azs22.4 ATCCA
azs22.1 ATCCG
azs22.3 A-CCA
azs22.5 A-CCA
azs22.19 A-CCA
azs22.7 A-CCA
azs22.8 ATCCA
azs22.2 ATCCA
azs22.20 ATCCA
azs22.6 A-CCA
azs22.9 ATCCA
azs22.16 ATACA

```

**Figure S4** The alignment of the 22-kDa  $\alpha$ -zein promoters from B73 and the copy Zp22/6 from BSS53. The cytosine positions indicated in Figs. 4b, 7c and 9 are marked in the corresponding places; P-box and “ACGT” core motif are shaded.

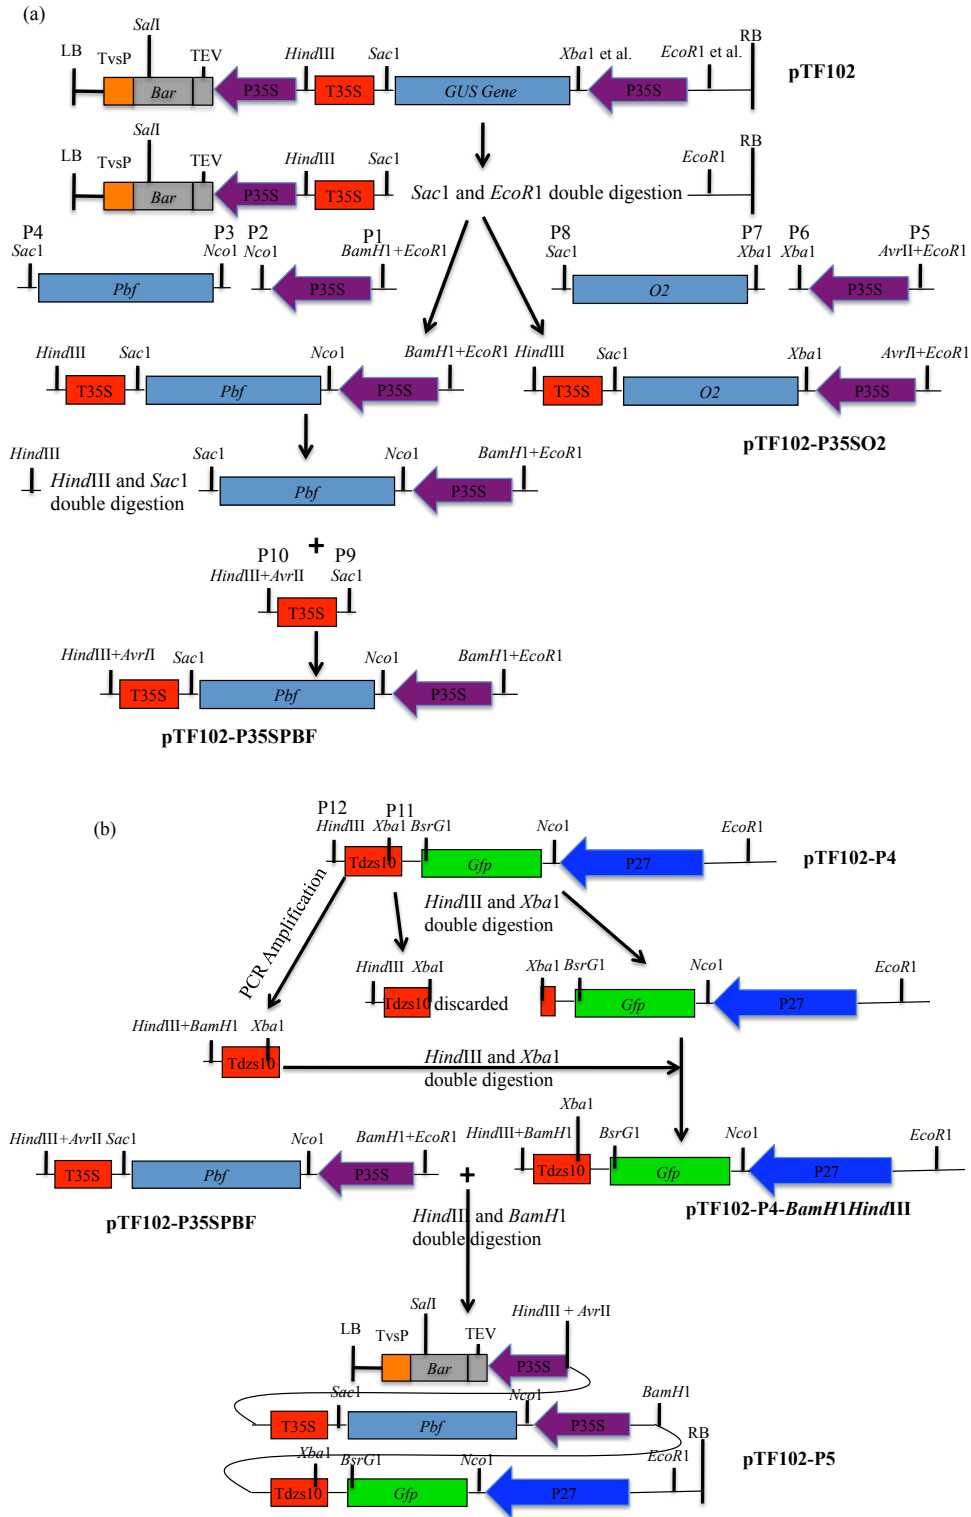

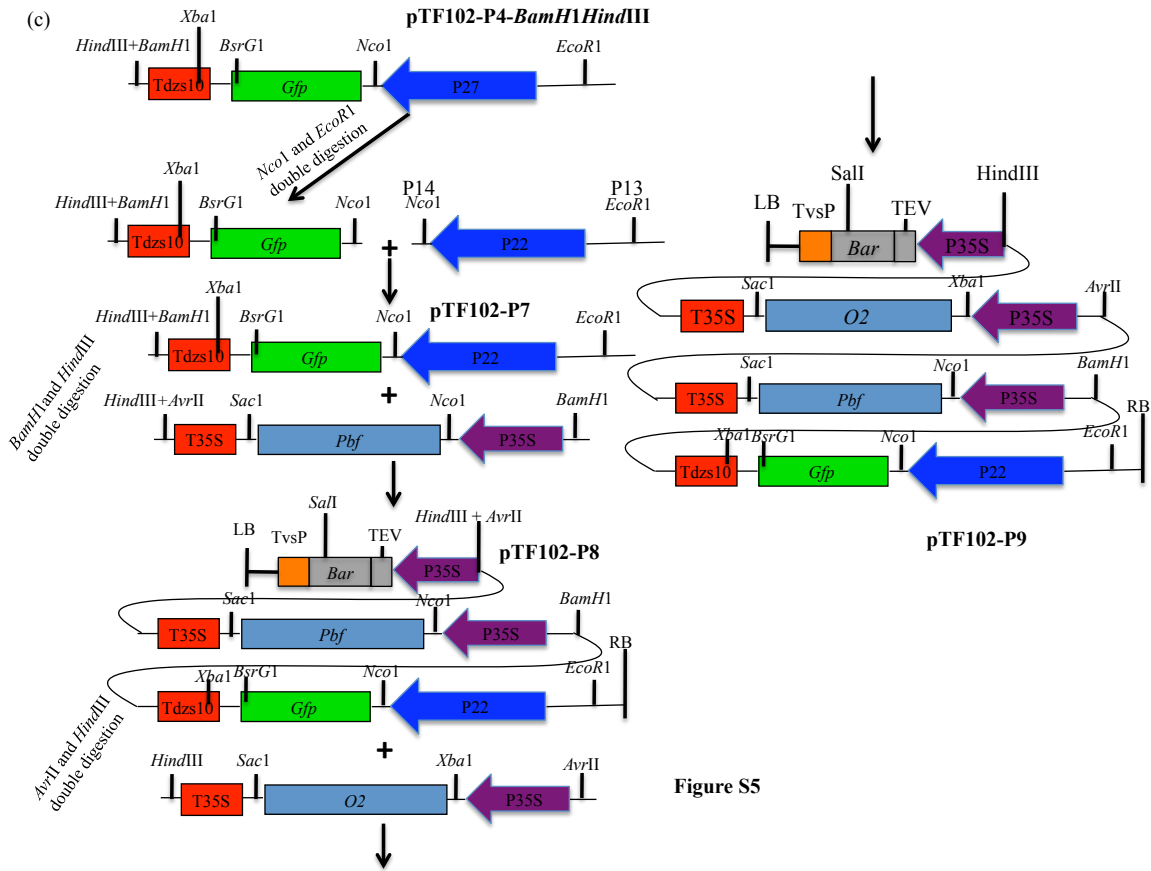

**Figure S5** Strategies of plasmid construction. (a) P35SPBF and P35SO2 cassettes. (b) pTF102-P5. (c) pTF102-P9. Primers P1-P14 used for plasmid construction are indicated in the corresponding step.

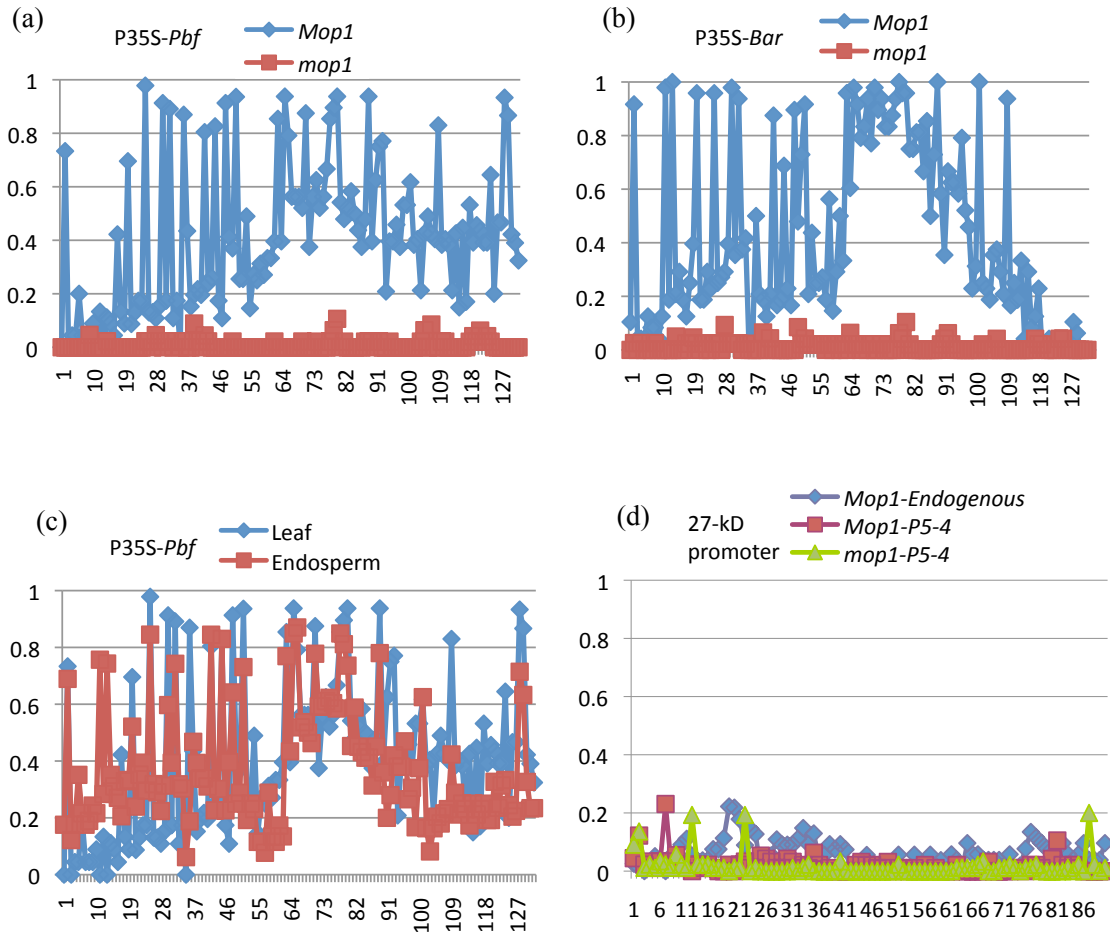

**Figure S6** DNA methylation of 35S and transgenic 27-kDa  $\gamma$ -zein promoters in *Mop1-P5-4* and *mop1-P5-4*. (a) The 35S promoter driving the *Pbf* gene in *Mop1-P5-4* and *mop1-P5-4*. (b) The 35S promoter driving the selective marker *Bar* gene in *Mop1-P5-4* and *mop1-P5-4*. (c) The 35S promoter driving the *Pbf* gene in *Mop1-P5-4* leaf and endosperm. (d) The transgenic 27-kDa  $\gamma$ -zein promoter driving the *Gfp* gene.



G A G C A A T G T A T T G G T T G T G A G T T T  
 T T G A C G G C G C T C A C A G T G A T A G A T  
 T T G T T A T C T A T A T G C C A G C C C A G  
 C A T A T T C A T C T T G T G C T G T G G G C  
 G T C T A G A G G A C C G A C A A T A T A T A T  
 A T T T T A A A C A A A T T C G T G A A G A  
 A C A T C A C A A G T T A T G C A T G C A A A C  
 T G C T C A A G T C A T G T G G A T C C A A G G  
 C A T C C T A A C A A C T A G C A C A G C A T T  
 A C A A C A A A T A T T G G T G T A T A T G T  
 G C C T A C A A T G A A G T G A A A G G T G A T  
 G A G T C A T G G T G A T G T G T A A A G A G G  
 C A T T A C A A A G T T A G C T T C A C A A G C  
 G T A T G A A T T C A T T G A C A A C C C T T G  
 A C A T G T A A A G T T G A T T C A T A T G T A  
 T A A G A A A G C T T A A T G A T C T A T C T G  
 T A A A T C C A A A T C C A T G T A C T A T G T  
 T T C C A C G T C A T G C A A C G C A A C A T T  
 C C A A A A C C A T G G G T T G C A A G A T G C  
 T G C A G A A T G C A A G C C A T G G A T C A T  
 C T A T A A A T G G C T A G C T C C C A C A T A  
 T G A A C T A G T C T T A T C A T C A T C C A  
 A T C C A G A T C A G C A A A G C G G C A G T G  
 C G T A G A G A G G A T C G T C G A A C A G A A  
 C A G C A T G

**Figure S7** Cytosines in  $\beta$ -zein promoter. The 559-bp fragment upstream of the start codon contains 110 cytosines, covering the P-box, O2 box and TATA box. P-box, "ACGT" core motif and TATA box are shaded. The cytosine positions indicated in Fig. 11b are numbered in the sequence.

**Table S1 List of primers**

| Primer   | Sequence                                          | Note                                                                                          |
|----------|---------------------------------------------------|-----------------------------------------------------------------------------------------------|
| pbfBamH1 | 5'-AATTGGATCCACTAACCTTATTGTCCCTTG-3'              |                                                                                               |
| pbfBspE1 | 5'-TATATCCGGAATGGACATGATCTCCGGCAG-3'              | <i>Pbf</i> RNAi construct                                                                     |
| pbfBbIII | 5'-AATAAGATCTATGGACATGATCTCCGGCAG-3'              |                                                                                               |
| pbfSac1  | 5'-AATTGAGCTCACTAACCTTATTGTCCCTTG-3'              |                                                                                               |
| Umc1066F | 5'-ATGGAGCACGTCATCTCAATGG-3'                      | <i>O2</i> polymorphic markers                                                                 |
| Umc1066R | 5'-AGCAGCAGCAACGTCTATGACACT-3'                    |                                                                                               |
| P1       | 5'- TATATGAATTC AAGGATCCGCATGCCGGTCAACATGGTG -3'  | P35S forward, <i>EcoR1</i> and <i>BamH1</i> introduced                                        |
| P2       | 5'- AAATCCATGGTAGATCCCCGTTTCGTAATG -3'            | P35S reverse, <i>Nco1</i> introduced                                                          |
| P3       | 5'- ATTACCATGGACATGATCTCCGGCAG -3'                | <i>Pbf</i> CDS forward, <i>Nco1</i> introduced                                                |
| P4       | 5'- AATTGAGCTCACTAACCTTATTGTCCCTTG -3'            | <i>Pbf</i> CDS reverse, <i>Sac1</i> introduced                                                |
| P5       | 5'- TATATGAATTC AACCTAGGGCATGCCGGTCAACATGGTG -3'  | P35S forward, <i>EcoR1</i> and <i>AvrII</i> introduced                                        |
| P6       | 5'- AAATCTAGAGGTAGATCCCCGTTTCGTAATG -3'           | P35S reverse, <i>Xba1</i> introduced                                                          |
| P7       | 5'- ATTATCTAGACCATGGAGCACGTCATCTCAATG -3'         | <i>O2</i> CDS forward, <i>Xba1</i> introduced                                                 |
| P8       | 5'- TAATGAGCTCCTTATTCAGCGACGCTG -3'               | <i>O2</i> CDS reverse, <i>Sac1</i> introduced                                                 |
| P9       | 5'-TATAGAGCTCGGCGCAAAAATCACCAGTC-3'               | T35S forward, <i>Sac1</i> introduced                                                          |
| P10      | 5'- ATT AAGCTTAATTCTAGGTGCAGGTCAGTGGATTTTGG -3'   | T35S reverse, <i>HindIII</i> and <i>AvrII</i> introduced                                      |
| P11      | 5'- AAAGCTGTACAAGTAAATAGAAATATTTGTGTTGTATCG -3'   | Terminator of 10-kDa $\delta$ -zein gene, forward                                             |
| P12      | 5'- ATCAAGCTTACTAGTGGATCCTACCAGCTGAGAATTAGGAG -3' | Terminator of 10-kDa $\delta$ -zein gene, reverse, <i>HindIII</i> and <i>BamH1</i> introduced |
| P13      | 5'- ATTTGAATTCGTCCACGCGCAAATAGACC -3'             | 22-kDa zein promoter forward, <i>EcoR1</i> introduced                                         |
| P14      | 5'- TAATCCATGGTTGTTTGGTCTGTTGCTAGTG -3'           | 22-kDa zein promoter                                                                          |

|                   |                                        |                                     |
|-------------------|----------------------------------------|-------------------------------------|
|                   |                                        | reverse, <i>Nco</i> 1<br>introduced |
| $\gamma$ 50F      | 5'-ATGAAGCTGGTGCTTGTGGTTC-3'           |                                     |
| $\gamma$ 50R      | 5'-TAATGTCATTGCTGCTGCATGG-3'           | For $\gamma$ 50 RT-PCR              |
| $\gamma$ 27F      | 5'-ATGAGGGTGTGCTCGTTGC-3'              |                                     |
| $\gamma$ 27R      | 5'-ACTCAACTAGCTAGCTAGCC-3'             | For $\gamma$ 27 RT-PCR              |
| $\alpha$ 22F1     | 5'-ACACCATATGTTTCATTATTCCACAATGCTCA-3' |                                     |
| $\alpha$ 22R1     | 5'-TTAAGGATCCTATATAATCTAAAAGATGGCA-3'  | For $\alpha$ 22 RT-PCR              |
| $\alpha$ 19AF     | CTCTTAa/gATTAGTAGCTAATat/cATC          |                                     |
| $\alpha$ 19AR     | CTGGGAAGCCACAAACATCA                   | For $\alpha$ 19A RT-PCR             |
| $\alpha$ 19BDF    | ATTAGTCGGTAATCCATCAACC                 |                                     |
| $\alpha$ 19BDR    | CTAGAAGATGGCACCACCAATG                 | For $\alpha$ 19B and D RT-PCR       |
| $\delta$ 18F      | 5'-CGCCATGGCAGCCAAGATG-3'              |                                     |
| $\delta$ 18R      | 5'-ATGCCGACTTCATTATTGGG-3'             | For $\delta$ 18 RT-PCR              |
| $\gamma$ 16F      | 5'-TCGACACCATGAAGGTGCTG-3'             |                                     |
| $\gamma$ 16R      | 5'-TGGTGATGGGTGACACTACG-3'             | For $\gamma$ 16 RT-PCR              |
| $\beta$ 15F       | 5'-AGGATCGTCGAACAGAACAGC-3'            |                                     |
| $\beta$ 15R       | 5'-AGATGGATAGAGGAGATTTCCC-3'           | For $\beta$ 15 RT-PCR               |
| $\delta$ 10F      | 5'-ATACTCTAGGAAGCAAGGAC-3'             |                                     |
| $\delta$ 10R      | 5'-TAAGAACATGGGTGGAATCG-3'             | For $\delta$ 10 RT-PCR              |
| $\delta$ 18-10F   | 5'-CGCCATGGCAGCCAAGATG-3'              | Common primer pair for              |
| $\delta$ 18-10R   | 5'-TATCTAGAATGCAGCACCAAC-3'            | $\delta$ 18 and $\delta$ 10 RT-PCR  |
| PbfF              | 5'-ATGGACATGATCTCCGGCAG-3'             |                                     |
| PbfR              | 5'-ACTAACCTTATTGTCCCTTG-3'             | For <i>Pbf</i> RT-PCR               |
| O2F               | 5'-ATGGAGCACGTACTCTCAATG-3'            |                                     |
| O2R               | 5'-CCTTATTCAGCGACGCTG-3'               | For <i>O2</i> RT-PCR                |
| GFPF1             | 5'-ATGGTGAGCAAGGGCGAGG-3'              |                                     |
| GFPR1             | 5'-TACTTGTACAGCTCGTCC-3'               | For <i>Gfp</i> RT-PCR               |
| P22F1             | 5'-ACATGTGTAAAGGTGAAGAG-3'             |                                     |
| GFPR2             | 5'-GTGAGCAAGGGCGAGGAGCT-3'             |                                     |
| P22bisulF         | 5'-ATATGTGTAAAGGTGAAGAG-3'             |                                     |
| $\alpha$ 22bisulR | 5'-CTAATATCTTAATAACCATT -3'            |                                     |
| GFPbisulR         | 5'-AACTCCTCACCTTACTCAC-3'              |                                     |
| P27bisulF         | 5'-GAAATATGGTGAGTTATGTTGAG-3'          |                                     |
| $\gamma$ 27bisulR | 5'-AAAACAACAAACAACCCCTC-3'             |                                     |
| P35SbisulF        | 5'-ATGTTGGTTAATATGGTGGAG-3'            |                                     |
| BarbisulR         | 5'-ACCACCAACATATCCACCTC-3'             |                                     |
| PbfbisulR         | 5'-CTTTAAATCCCTAACTTCTCC-3'            |                                     |

β15bisulF

5'- GAGTAATGTATTGGTTGTGAG -3'

β15bisulR

5'- CTATTCAACAATCCTCTCTAC -3'

---

Restriction enzyme cutting sites are colored in red.
