# Supplementary material
Source: PubMed Central journal article supplement (PMC3454880)
Supplement: supp_112.142372_FigureS2.pdf [file supp_112.142372_FigureS2.pdf]

```

ZM27  --AAAAATAA-AATAGGCCGGACAG--GACAAAAATCCTTGACGTGTAAGTAAATTTAC -267
SB27  GTAAAAACAA-AGTAGGCCGGAGAGAGGACAATAATCCTTGACGTGTAAGTGAATTTAC -250
ZM16  --AAAAGCAAGAGTAGGACGGAGAG--GAAAAATAATCCTTGACG-----ACGTGC -183
      ****  ** * ****  **** **  ** ** *****
      * * *

ZM27  AACAAAAAAAAGCCATATGTCAAGCTAAATCTAATTCGTTTACGTAGAT--CAACAACC -209
SB27  AA-----AGCCATATATCAATTTATATCTAATTCGTTTCATGTAGATATCAACAACC -198
ZM16  A-----CATGAGCCA----- -173
      *          ***   **

ZM27  TGTAGAAGGCAACAAAAGCTGAGCCACGCAGAAGTACAGAATGATTCAGATGAACCATCG -149
SB27  TGTAAAAGGCAACAAA-TTGAGCCACGCAAAATTACA-AGTGAGTCCAAATPAAACCTC- -141
ZM16  -----CACGCAAGAGTACTGAATAAATCCAGATGAACCTCC -136
      ***** * *** * * * **** * * **** **

ZM27  ACGTGCTACGTAAAGA-GAGTGACGAGTCATATACATTTGGCAAGAAACCATGAAGCTGC -90
SB27  ACATGCTACATAAAAAGTGAATGATGAGTCATGTATATCTGGCAAGAAACTGTAGA---AG -84
ZM16  AAAAG-TGAATGAGAT-GAGTCATG-----TATACATTTGGCAAGAAACCGTAGA---AG -86
      * * * * * ** * * * * * * * * * * * * * * * * * *

ZM27  CTACAGCCGTCTCGGTGGCATAAAGAACACAAGAAATTTGTGTTAATTAATCAAAGCTATAAA -30
SB27  CTACAGTCATC--GGTAGCAAAGAAACACAAGAAATGTGCTAATAA----AAGCTATAAA -30
ZM16  CTACCGCCATC--GATTCATCATAGAAGAAGAAATTTGTGGTAATCGG--AAAGCTATAAA -30
      **** * * ** * * * * * * * * * * * * * * * * * *
      +1 Transcription Start

ZM27  ATAACGCTCGCATGCCTGTGCACTTCTCCATCACACCACCTGGGTCT---TCAGACCATT 28
SB27  ATAACCCTCGTACGCCTATGCACATCTCCATCACACCACCTGGTCTTCATTCAGCCTATT 31
ZM16  ATAACCCTCGTATGCCTATGCACCTTCTCCACCACCACCACCTGGACGTCAGCCTAGCAATT 31

```

**Figure S2** Alignment of the 27- and 16-kDa  $\gamma$ -zein and 27-kDa  $\gamma$ -kafirin promoters.
