# Supplementary material
Source: PubMed Central journal article supplement (PMC3454880)
Supplement: supp_112.142372_FigureS3.pdf [file supp_112.142372_FigureS3.pdf]

1 2 3 4 5 6  
 C A C G G T G A G T C A T G C C G A G A T C A T  
 7 8 9 10 11 12  
 A C T C A T C T G A T A T A C A T G C T T A C A  
 13 14 15 16 17 18 19  
 G C T C A C A A G A C A T T A C A A A C A A C T  
 20 21 22 23  
 C A T A T T G C A T T A C A A A G A T C G T T T  
 24 25 26 27  
 C A T G A A A A T A A A A T A G G C C G G A C  
 28 29 30 31  
 A G G A C A A A A A T C C T T G A C G T G T A A  
 32 33 34  
 A G T A A A T T T A C A A C A A A A A A A G C  
 35 36 37 38 39  
 C A T A T G T C A A G C T A A A T C T A A T T C  
 40 41 42 43 44  
 G T T T T A C G T A G A T C A A C A A C C T G T  
 45 46 47 48 49 50  
 A G A A G G C A A C A A A A C T G A G C C A C G  
 51 52 53 54  
 C A G A A G T A C A G A A T G A T T C C A G A T  
 55 56 57 58 59 60  
 G A A C C A T C G A C G T G C T A C G T A A A G  
 61 62 63  
 A G A G T G A C G A G T C A T A T A C A T T T G  
 64 65 66 67 68 69 70  
 G C A A G A A A C C A T G A A G C T G C C T A C  
 71 72 73 74 75 76  
 A G C C G T C T C G G T G G C A T A A G A A C A  
 77 78  
 C A A G A A A T T G T G T T A A T T A A T C A A  
 79 80 81 82 83 84 85  
 A G C T A T A A A T A A C G C T C G C A T G C C  
 86 87 88 89 90  
 T G T G C A C T T C T C C **A** (Transcription Start Site)

**Figure S3** Cytosines in the 27-kDa  $\gamma$ -zein promoter. The 421-bp fragment immediately upstream of the transcription start site contains 90 cytosines, covering the P-box, O2-like box and TATA box. P-box, “ACGT” core motif and TATA box are shaded. The cytosine positions indicated in Figs. 4a and S6d are numbered in the sequence.
