# Supplementary material
Source: PubMed Central journal article supplement (PMC3454880)
Supplement: supp_112.142372_FigureS4.pdf [file supp_112.142372_FigureS4.pdf]

|          |  |                                                                      |    |    |    |    |    |    |    |    |    |
|----------|--|----------------------------------------------------------------------|----|----|----|----|----|----|----|----|----|
|          |  | 1                                                                    | 2  | 3  | 4  |    |    |    |    |    |    |
| Zp22/6   |  | <b>TGTGTAAGGTGAAGAGATCTTGCATGTCATTC</b>                              |    |    |    |    |    |    |    |    |    |
| azs22.11 |  | TGTGTAAGGTGAAGAGATGATGCATGTCAT-C                                     |    |    |    |    |    |    |    |    |    |
| azs22.12 |  | TGTGTAAGGTGAAGAGATGATGCATGTCAT-C                                     |    |    |    |    |    |    |    |    |    |
| azs22.13 |  | TGTGCAAGGTGAAGAGATCATGCATGTCATTC                                     |    |    |    |    |    |    |    |    |    |
| azs22.4  |  | TGTGTAAGGTGAAGAGATCATGCATGTCATTC                                     |    |    |    |    |    |    |    |    |    |
| azs22.1  |  | TGTGTAAGGTGAAGCGATCATGCATGTCATTC                                     |    |    |    |    |    |    |    |    |    |
| azs22.3  |  | TGTGTAAGGTGAAGAGATCATGCATGTCATTC                                     |    |    |    |    |    |    |    |    |    |
| azs22.5  |  | TGTGTAAGGTGAAGAGATCATGCATGTCATTC                                     |    |    |    |    |    |    |    |    |    |
| azs22.19 |  | TGTGTAAGGTGAAGAGATCATGCATGTCATTC                                     |    |    |    |    |    |    |    |    |    |
| azs22.7  |  | TGTGTAAGGTGAAGAGATCATGCATGTCATTC                                     |    |    |    |    |    |    |    |    |    |
| azs22.8  |  | TGTGTAAGGTGAAGAGATCATGCATGTCATTC                                     |    |    |    |    |    |    |    |    |    |
| azs22.2  |  | TGTGTAAGGTGAAGCGATCATGCATGTCATTC                                     |    |    |    |    |    |    |    |    |    |
| azs22.20 |  | TGTGTAAGGTGAAGAGATCATGCATTTTCATTC                                    |    |    |    |    |    |    |    |    |    |
| azs22.6  |  | TGTTTAAAGGTGAAGAGATCATGCATGTCATTC                                    |    |    |    |    |    |    |    |    |    |
| azs22.9  |  | TGTGTAAGGTGAAGAGATCATGCATGTCATTC                                     |    |    |    |    |    |    |    |    |    |
| azs22.16 |  | TGTGTAAGGTGAAGAGATCATGCATGTCATTC                                     |    |    |    |    |    |    |    |    |    |
|          |  | 5                                                                    | 6  | 7  | 8  | 9  | 10 |    |    |    |    |
| Zp22/6   |  | <b>CACGTAGAT-AAAAAGAATGCATATATAAAAAATGGCACATTTTCTTGTAGGTAGTGGAAA</b> |    |    |    |    |    |    |    |    |    |
| azs22.11 |  | CAAGTATATGAAAAT-AATTCCTATA-GAAAATGACACTTTTTCTTATAGGTAGTGGAAA         |    |    |    |    |    |    |    |    |    |
| azs22.12 |  | CAAGTATATGAAAAG-AATTCCTATA-GAAAATGACAATTTTTCTTGTAGGTAATGGAAA         |    |    |    |    |    |    |    |    |    |
| azs22.13 |  | CTCATGTATGAAAAG-AATTCCTATA-GAAAATGACGAATTTTCTTGTAGGTAGTGGAAA         |    |    |    |    |    |    |    |    |    |
| azs22.4  |  | CACGTAGATGAAAAG--AATTCCTATATAAAAAATGACACCTTTTCTTGTAGGTAGTGGAAA       |    |    |    |    |    |    |    |    |    |
| azs22.1  |  | CACGTAGATGAAAAAATTCCTATATAAAAAATGACAATTTTTCTTGTAGGTAGTGGAAA          |    |    |    |    |    |    |    |    |    |
| azs22.3  |  | CACGTAGATGAAAAG-AATTCCTATATAAAAA-TGACACCTTTTCTTGTAGGTAGTGGAAA        |    |    |    |    |    |    |    |    |    |
| azs22.5  |  | CACGTAGATGAAAAG-AATTCCTATATAAAAA-TGACACCTTTTCTTGTAGGTAGTGGAAA        |    |    |    |    |    |    |    |    |    |
| azs22.19 |  | CACGTAGATGAAAAG-AATTCCTATATAAAAA-TGACACCTTTTCTTGTAGGTAGTGGAAA        |    |    |    |    |    |    |    |    |    |
| azs22.7  |  | CACGTAGATGAAAAG-AATTCCTATATAAAAA-TGACACCTTTTCTTGTAGGTAGTGGAAA        |    |    |    |    |    |    |    |    |    |
| azs22.8  |  | CACGTAGATGAAAAG-AATTCCTATATAAAAA-TGACACCTTTTCTTGTAGGTAGTGGAAA        |    |    |    |    |    |    |    |    |    |
| azs22.2  |  | CACATAGATTAATAAA-AAATCCTATATAAAAAATGACAATTTTTCTTGTAGGTAGTGGAAA       |    |    |    |    |    |    |    |    |    |
| azs22.20 |  | CACGTAGATAAAAAG-AGTTCCTATATAAGAATGGCACATTTTCTTGTAGGTAGTGGAAA         |    |    |    |    |    |    |    |    |    |
| azs22.6  |  | CACGTAGATGAAAAG-AATTCCTATATAAAAA-TGACACATTTTCTTGTAGGTAGTGGAAA        |    |    |    |    |    |    |    |    |    |
| azs22.9  |  | CACGTAGATAAAAAG-AATGCCTATATAAAAAATGGCACATTTTCTTGTAGGTAGTGGAAA        |    |    |    |    |    |    |    |    |    |
| azs22.16 |  | CACATAAATGAAAAG-AATTCCTATATAAAAAATGACATGTTTTGTTGTAGGTAGTGGAAA        |    |    |    |    |    |    |    |    |    |
|          |  | 11                                                                   | 12 | 13 | 14 | 15 | 16 | 17 | 18 | 19 | 20 |
| Zp22/6   |  | <b>GTATCTTTCCAGCTAAGACC----ATATAATCCGATAAAGGTGATAACTAAATGTCGAAA</b>  |    |    |    |    |    |    |    |    |    |
| azs22.11 |  | CTATCTTTCTA-----TATAATCCGATGAAACCGATAACTAAATGTCGAAA                  |    |    |    |    |    |    |    |    |    |
| azs22.12 |  | CTAGCTTTCCAGCAAAGACCA----TATAATCTGATGAAACTGATAACCAAATGTCGAAA         |    |    |    |    |    |    |    |    |    |
| azs22.13 |  | CTATCTTTATAGCAAAGTCCA----TATAATCATATGAAACTGATGACTAAATGTCAAAA         |    |    |    |    |    |    |    |    |    |
| azs22.4  |  | GTACCTTTCCAGCAAAGATCATATATATAATCCGATAAAGCTGAAAACAAATGTCGAAA          |    |    |    |    |    |    |    |    |    |
| azs22.1  |  | CTATCTTTCTAGCAAAGACCATATATATAATCCGATAAAGCCGATAACTAAATGTCGAAA         |    |    |    |    |    |    |    |    |    |
| azs22.3  |  | GTATCTTTCCAGCAAAGACCATATA----ATCCGATAAAGTTGATAACTAAATGTCAAAA         |    |    |    |    |    |    |    |    |    |
| azs22.5  |  | GTATCTTTCCAGCAAAGACCATATA----ATCCAATAAAGTTGATAACTAAATGTCGAAA         |    |    |    |    |    |    |    |    |    |
| azs22.19 |  | GTATCTTTCCAGCAAAGACCATATA----ATCCGATAAAGTTGATAACTAAATGTCAAAA         |    |    |    |    |    |    |    |    |    |
| azs22.7  |  | GTATCTTTCCAGCAAAGACCATATA----ATCCGATAAAGTTGATAACTAAATGTCGAAA         |    |    |    |    |    |    |    |    |    |
| azs22.8  |  | GTATCTTTCCAGCAAATACCATATA----ATCCGATAAAGCCGATAACTAAATGTCGAAA         |    |    |    |    |    |    |    |    |    |
| azs22.2  |  | GTATCTTTCCAGCAAAGACTATATATAATCCGATAAAGCCGATAACTAAATGTCAAAA           |    |    |    |    |    |    |    |    |    |
| azs22.20 |  | GTATCTTTCCAGCAAATACCATATA----ATCCGATAAAGATGATAACTAAATGTCGAAA         |    |    |    |    |    |    |    |    |    |
| azs22.6  |  | GTATCTTTCCAGCAAAGACTATA----ATCCGATAAAGTTGATAACTAAATGTCGAAA           |    |    |    |    |    |    |    |    |    |
| azs22.9  |  | GTATCTTTCCAGCAAAGACCATATA----ATCCGATAAAGCTGATAACTAAATGTCGAAA         |    |    |    |    |    |    |    |    |    |
| azs22.16 |  | TTATCTTTCCAGCAAAGACCATATA----ATCCGATAAAGCTGATAACTAAATGTCAAAA         |    |    |    |    |    |    |    |    |    |
|          |  | 21                                                                   | 22 | 23 | 24 | 25 | 26 | 27 | 28 | 29 |    |
| Zp22/6   |  | <b>TCGAGTAGATGCCATATCATCTATACCTTATCTGTTGTTGG--AAAAAAGACAAAAT</b>     |    |    |    |    |    |    |    |    |    |
| azs22.11 |  | TTGAGTAGGTGCCATATCATCGATAGCTTATCTATTGTTTGGC--AAAA--GACAAAAT          |    |    |    |    |    |    |    |    |    |
| azs22.12 |  | TTGAGTAGGTGCCATATCATCTGATAGCTTATCTATTGTTTGGC--AAAA--GATAAAAAT        |    |    |    |    |    |    |    |    |    |
| azs22.13 |  | TTGAGTAGGTGCCATATCATCTATAGCTTATCCATTGTTGGGA--AAAA--TACAAAAT          |    |    |    |    |    |    |    |    |    |
| azs22.4  |  | TCGAGTAGATGCCATATCATCTATACCTTATCTCTTGTGTTGGA--AAAA--GACAAAAC         |    |    |    |    |    |    |    |    |    |
| azs22.1  |  | TCGAGTAGATGCCATATCATCTATACCTTATCTGTTGTTGG--AAAA--GACAAAAT            |    |    |    |    |    |    |    |    |    |
| azs22.3  |  | TAGAGTAGATGCCATATCATATATACCTTATCTGTTGTTGGA--AAAAAAGACTAAAT           |    |    |    |    |    |    |    |    |    |
| azs22.5  |  | TAGAGTAGATGCCATATCATTTATACCTTATCTGTTGTTGGA--AAAAA-GACTAAAT           |    |    |    |    |    |    |    |    |    |

```

azs22.19 TAGAGTAGATGCCATATCATCTATACCTTATCTGTTGTTTGGGA--AAAA---GACTAAAT
azs22.7 TAGAGTAGATGCCATATCATCTATACCTTATCTGTTGTTTGGGA--AAAA---GACTAAAT
azs22.8 TCGAGTAGATGCCATATCATCTATACCTTATCTGTTGTTTGGGA--AAAA---GACAAAAAT
azs22.2 TCGAGTAGATGCCATATCATCTATACCTTATCTGTTGTTTGGGA--AAAA---GACAAAAAT
azs22.20 TCGAGTAGATGCCATATCATCTATACCTTATCTGTTGTTTGGGA--AAAA---GACAAAAAT
azs22.6 AAGAGTAGATGCCATATCATCTATACCTTATCTGTTGTTTGGGA--AAAA---GACTAACT
azs22.9 TCGAGTAGATGCCATATCATCTATACCTTATCTGTTGTTTGGAAAAAAGACAAAAAT
azs22.16 TCGAGTAAGTGCCATATCATCTATACCTTATCTGTTGTTTGGGA--AAAA---GACAAAAAT

3031 32333435 36373839 40
Zp22/6 CCAAAAAA-TTTATAT----GAGATCTCACCTATATAAAATAGCGCCCAAATCAGTAGTTA
azs22.11 CCAATATATATATATAT----GAGATCTCACATGTATGAATATCTCCCAAATCAGTAGTTA
azs22.12 CCAATATATATATATATATGAGATCTCACCTATATAAAATATCTCCCAAATCAGTAGTTA
azs22.13 CCAAAAA-ATATATAT----GAGACCTCACCTGTATATAAACCACCAAATCAGTAGTTA
azs22.4 CAAAAA--TATTTAT----GAGGTCCTCACTTGTATAAAATAGCTCCCAAATCAGTAGTTA
azs22.1 CCAAAAA-ATATATAT----GAGATCTCACTTGTATGAATAGCTCCCAAATCAGTAATTA
azs22.3 CCCAAAA-ATATATAT----GAGATCTCACTTGTATAAAATAGCTCCCAAATTAGTAGTTA
azs22.5 CC--AAA-ATATATAT----GACATCTCACTTGTATAAAATAGCTCCCAAATCAGCAGTTA
azs22.19 CCAAAAA-ATATATAT----GAGATCTCACTTGTATAAAATAGCTCCCAAATCAGTAGTTA
azs22.7 CCAAAAAATATATATAT----AAGATCTCACTTGTATAAAATAGCTCCCAAATTAGTAGTTA
azs22.8 CCAAAAA-ATATATTT----GAGACCTCACCTGTATAAAATAGCTCCCAAATCAGTAGTTA
azs22.2 CCAAAAAAATATATAT----GAGATCTCACTTGTATAAAATAGCTCCCAAATCAGTAGTTA
azs22.20 CCAACAA-AAATATTC----GAGACCTCACCTATATAAAATAGCTCCCATATCAGTAGTTA
azs22.6 ACAAAAA-ATATATAT----GAGATCTCACTTGTATAAAATAGCTCCCAAATCAGTAGTTA
azs22.9 CCAAAAAAATATATAA----GAGATCTCACCTATATAAAATAGCTCTGAAATCAGTAGTTA
azs22.16 CCAAAAAAATATAT----GAGATCTCACATGTATAAAATAGCTCCCAAATCAGTAGTTA

4142
Zp22/6 ATCCA
azs22.11 ATTCA
azs22.12 ATCCA
azs22.13 ATTCA
azs22.4 ATCCA
azs22.1 ATCCG
azs22.3 A-CCA
azs22.5 A-CCA
azs22.19 A-CCA
azs22.7 A-CCA
azs22.8 ATCCA
azs22.2 ATCCA
azs22.20 ATCCA
azs22.6 A-CCA
azs22.9 ATCCA
azs22.16 ATACA

```

**Figure S4** The alignment of the 22-kDa  $\alpha$ -zein promoters from B73 and the copy Zp22/6 from BSS53. The cytosine positions indicated in Figs. 4b, 7c and 9 are marked in the corresponding places; P-box and “ACGT” core motif are shaded.
