# Supplementary material
Source: PubMed Central journal article supplement (PMC3454880)
Supplement: supp_112.142372_FigureS5.pdf [file supp_112.142372_FigureS5.pdf]

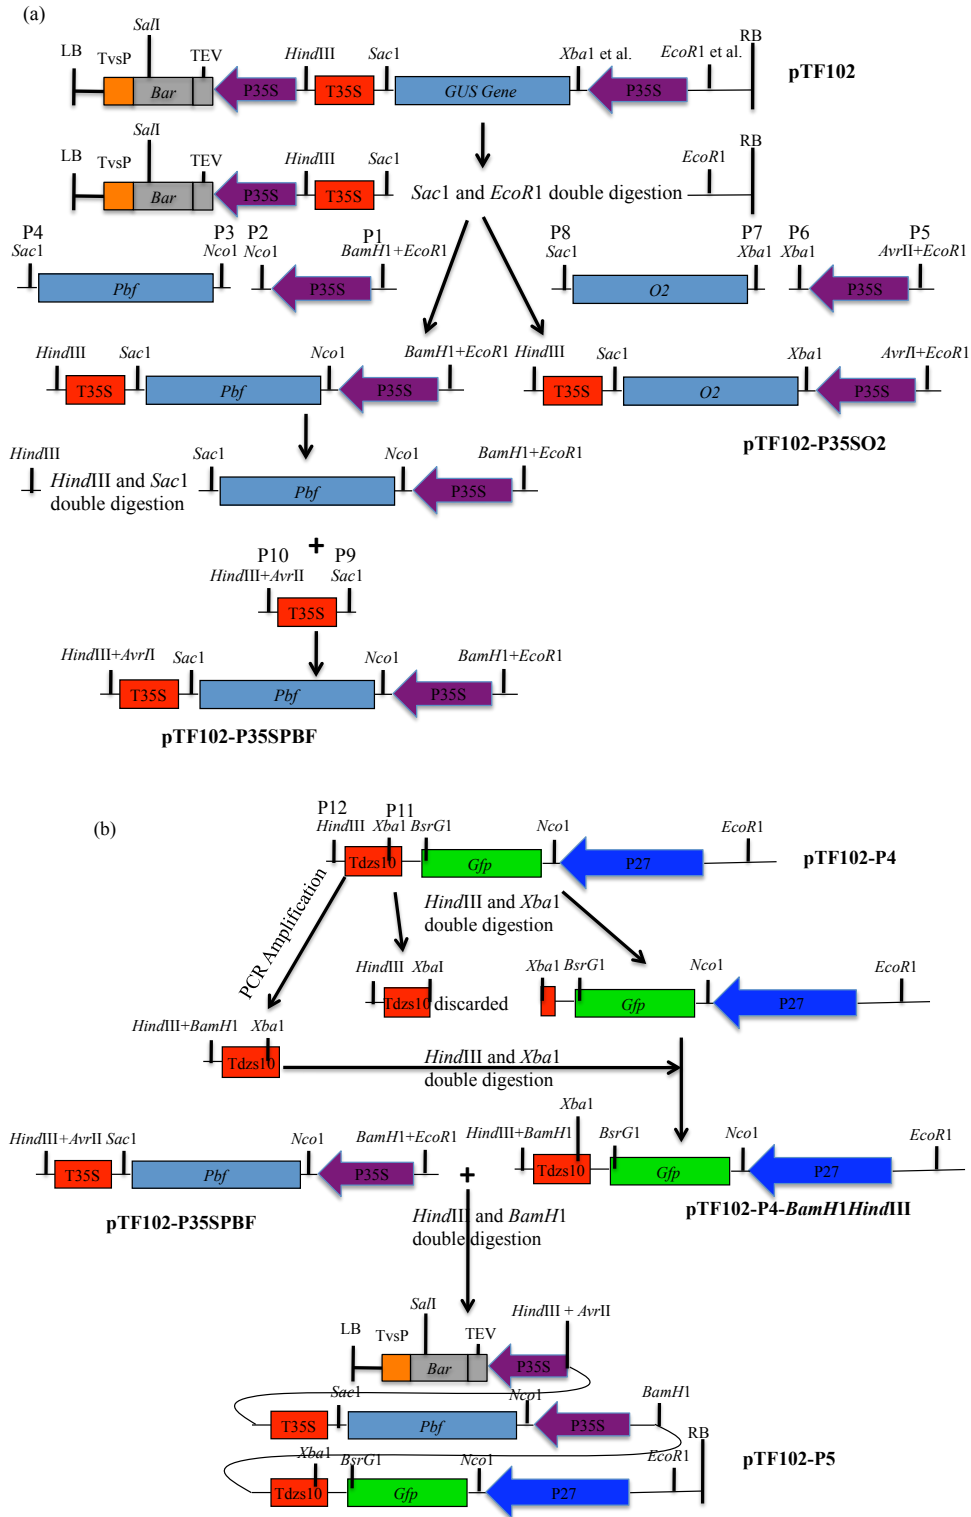

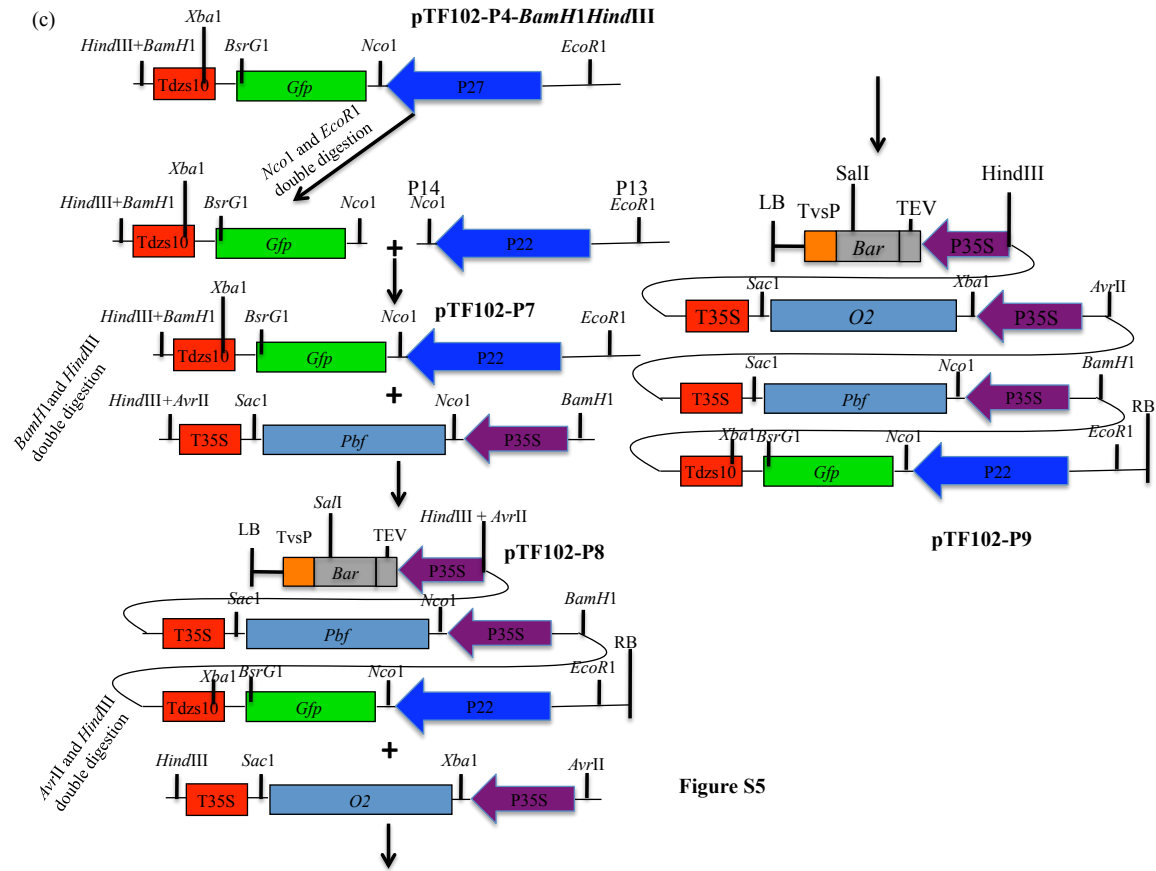

**Figure S5** Strategies of plasmid construction. (a) P35SPBF and P35SO2 cassettes. (b) pTF102-P5. (c) pTF102-P9. Primers P1-P14 used for plasmid construction are indicated in the corresponding step.
