# Supplementary material
Source: PubMed Central journal article supplement (PMC3454880)
Supplement: supp_112.142372_FigureS6.pdf [file supp_112.142372_FigureS6.pdf]

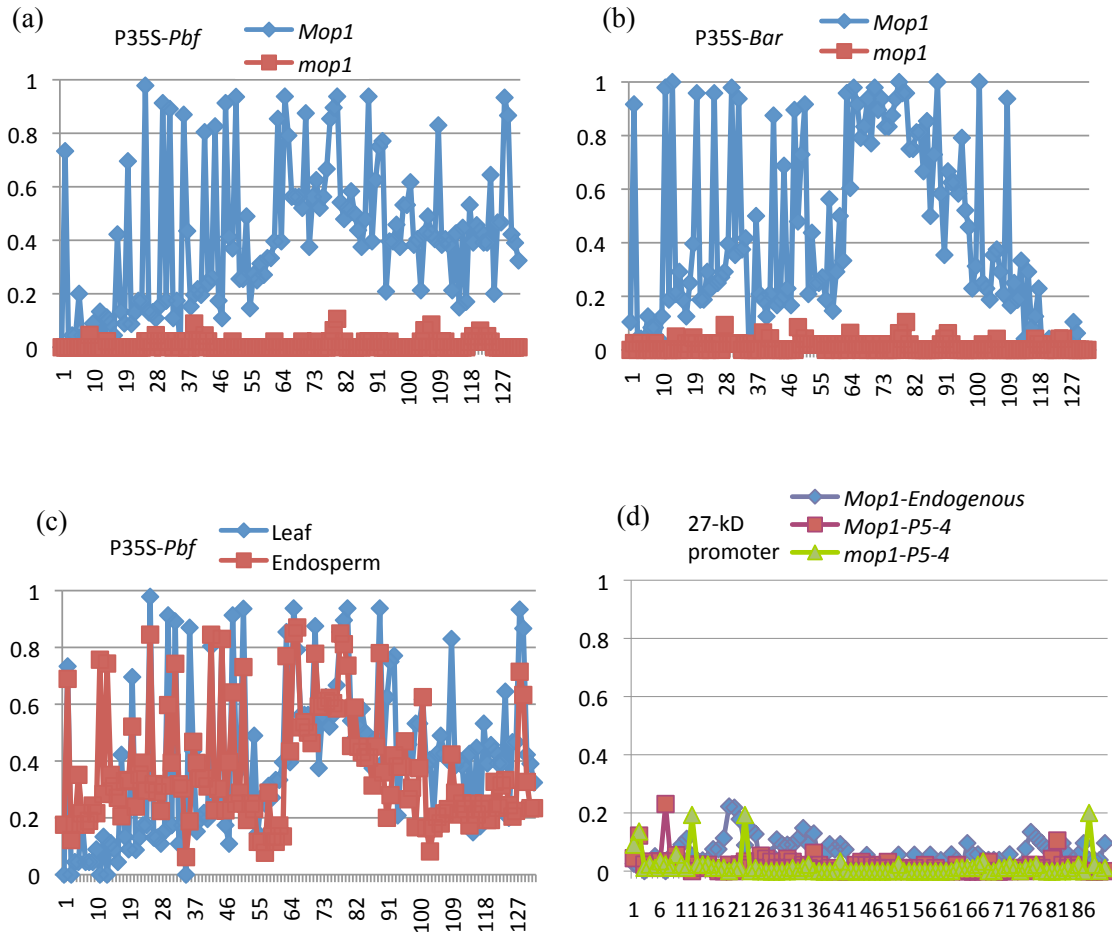

**Figure S6** DNA methylation of 35S and transgenic 27-kDa  $\gamma$ -zein promoters in *Mop1-P5-4* and *mop1-P5-4*. (a) The 35S promoter driving the *Pbf* gene in *Mop1-P5-4* and *mop1-P5-4*. (b) The 35S promoter driving the selective marker *Bar* gene in *Mop1-P5-4* and *mop1-P5-4*. (c) The 35S promoter driving the *Pbf* gene in *Mop1-P5-4* leaf and endosperm. (d) The transgenic 27-kDa  $\gamma$ -zein promoter driving the *Gfp* gene.
