# Supplementary material
Source: PubMed Central journal article supplement (PMC3454880)
Supplement: supp_112.142372_TableS1.pdf [file supp_112.142372_TableS1.pdf]

**Table S1 List of primers**

| Primer   | Sequence                                          | Note                                                                                          |
|----------|---------------------------------------------------|-----------------------------------------------------------------------------------------------|
| pbfBamH1 | 5'-AATTGGATCCACTAACCTTATTGTCCCTTG-3'              |                                                                                               |
| pbfBspE1 | 5'-TATATCCGGAATGGACATGATCTCCGGCAG-3'              | <i>Pbf</i> RNAi construct                                                                     |
| pbfBbIII | 5'-AATAAGATCTATGGACATGATCTCCGGCAG-3'              |                                                                                               |
| pbfSac1  | 5'-AATTGAGCTCACTAACCTTATTGTCCCTTG-3'              |                                                                                               |
| Umc1066F | 5'-ATGGAGCACGTCATCTCAATGG-3'                      | <i>O2</i> polymorphic markers                                                                 |
| Umc1066R | 5'-AGCAGCAGCAACGTCTATGACACT-3'                    |                                                                                               |
| P1       | 5'- TATATGAATTC AAGGATCCGCATGCCGGTCAACATGGTG -3'  | P35S forward, <i>EcoR1</i> and <i>BamH1</i> introduced                                        |
| P2       | 5'- AAATCCATGGTAGATCCCCGTTTCGTAATG -3'            | P35S reverse, <i>Nco1</i> introduced                                                          |
| P3       | 5'- ATTACCATGGACATGATCTCCGGCAG -3'                | <i>Pbf</i> CDS forward, <i>Nco1</i> introduced                                                |
| P4       | 5'- AATTGAGCTCACTAACCTTATTGTCCCTTG -3'            | <i>Pbf</i> CDS reverse, <i>Sac1</i> introduced                                                |
| P5       | 5'- TATATGAATTC AACCTAGGGCATGCCGGTCAACATGGTG -3'  | P35S forward, <i>EcoR1</i> and <i>AvrII</i> introduced                                        |
| P6       | 5'- AAATCTAGAGGTAGATCCCCGTTTCGTAATG -3'           | P35S reverse, <i>Xba1</i> introduced                                                          |
| P7       | 5'- ATTATCTAGACCATGGAGCACGTCATCTCAATG -3'         | <i>O2</i> CDS forward, <i>Xba1</i> introduced                                                 |
| P8       | 5'- TAATGAGCTCCTTATTCAGCGACGCTG -3'               | <i>O2</i> CDS reverse, <i>Sac1</i> introduced                                                 |
| P9       | 5'-TATAGAGCTCGGCGCAAAAATCACCAGTC-3'               | T35S forward, <i>Sac1</i> introduced                                                          |
| P10      | 5'- ATTAAAGCTTAATTCCTAGGTGCAGGTCAGTGGATTTTGG -3'  | T35S reverse, <i>HindIII</i> and <i>AvrII</i> introduced                                      |
| P11      | 5'- AAAGCTGTACAAGTAAATAGAAATATTTGTGTTGTATCG -3'   | Terminator of 10-kDa $\delta$ -zein gene, forward                                             |
| P12      | 5'- ATCAAGCTTACTAGTGGATCCTACCAGCTGAGAATTAGGAG -3' | Terminator of 10-kDa $\delta$ -zein gene, reverse, <i>HindIII</i> and <i>BamH1</i> introduced |
| P13      | 5'- ATTTGAATTCGTCCACGCGCAAATAGACC -3'             | 22-kDa zein promoter forward, <i>EcoR1</i> introduced                                         |
| P14      | 5'- TAATCCATGGTTGTTTGGTCTGTTGCTAGTG -3'           | 22-kDa zein promoter                                                                          |

|                   |                                        |                                     |
|-------------------|----------------------------------------|-------------------------------------|
|                   |                                        | reverse, <i>Nco</i> 1<br>introduced |
| $\gamma$ 50F      | 5'-ATGAAGCTGGTGCTTGTGGTTC-3'           |                                     |
| $\gamma$ 50R      | 5'-TAATGTCATTGCTGCTGCATGG-3'           | For $\gamma$ 50 RT-PCR              |
| $\gamma$ 27F      | 5'-ATGAGGGTGTGCTCGTTGC-3'              |                                     |
| $\gamma$ 27R      | 5'-ACTCAACTAGCTAGCTAGCC-3'             | For $\gamma$ 27 RT-PCR              |
| $\alpha$ 22F1     | 5'-ACACCATATGTTTCATTATTCCACAATGCTCA-3' |                                     |
| $\alpha$ 22R1     | 5'-TTAAGGATCCTATATAATCTAAAAGATGGCA-3'  | For $\alpha$ 22 RT-PCR              |
| $\alpha$ 19AF     | CTCTTAa/gATTAGTAGCTAATat/cATC          |                                     |
| $\alpha$ 19AR     | CTGGGAAGCCACAAACATCA                   | For $\alpha$ 19A RT-PCR             |
| $\alpha$ 19BDF    | ATTAGTCGGTAATCCATCAACC                 |                                     |
| $\alpha$ 19BDR    | CTAGAAGATGGCACCACCAATG                 | For $\alpha$ 19B and D RT-PCR       |
| $\delta$ 18F      | 5'-CGCCATGGCAGCCAAGATG-3'              |                                     |
| $\delta$ 18R      | 5'-ATGCCGACTTCATTATTGGG-3'             | For $\delta$ 18 RT-PCR              |
| $\gamma$ 16F      | 5'-TCGACACCATGAAGGTGCTG-3'             |                                     |
| $\gamma$ 16R      | 5'-TGGTGATGGGTGACACTACG-3'             | For $\gamma$ 16 RT-PCR              |
| $\beta$ 15F       | 5'-AGGATCGTCGAACAGAACAGC-3'            |                                     |
| $\beta$ 15R       | 5'-AGATGGATAGAGGAGATTCC-3'             | For $\beta$ 15 RT-PCR               |
| $\delta$ 10F      | 5'-ATACTCTAGGAAGCAAGGAC-3'             |                                     |
| $\delta$ 10R      | 5'-TAAGAACATGGGTGGAATCG-3'             | For $\delta$ 10 RT-PCR              |
| $\delta$ 18-10F   | 5'-CGCCATGGCAGCCAAGATG-3'              | Common primer pair for              |
| $\delta$ 18-10R   | 5'-TATCTAGAATGCAGCACCAAC-3'            | $\delta$ 18 and $\delta$ 10 RT-PCR  |
| PbfF              | 5'-ATGGACATGATCTCCGGCAG-3'             |                                     |
| PbfR              | 5'-ACTAACCTTATTGTCCCTTG-3'             | For <i>Pbf</i> RT-PCR               |
| O2F               | 5'-ATGGAGCACGTACTCTCAATG-3'            |                                     |
| O2R               | 5'-CCTTATTCAGCGACGCTG-3'               | For <i>O2</i> RT-PCR                |
| GFPF1             | 5'-ATGGTGAGCAAGGGCGAGG-3'              |                                     |
| GFPR1             | 5'-TTACTTGACAGCTCGTCC-3'               | For <i>Gfp</i> RT-PCR               |
| P22F1             | 5'-ACATGTGTAAAGGTGAAGAG-3'             |                                     |
| GFPR2             | 5'-GTGAGCAAGGGCGAGGAGCT-3'             |                                     |
| P22bisulF         | 5'-ATATGTGTAAAGGTGAAGAG-3'             |                                     |
| $\alpha$ 22bisulR | 5'-CTAATATCTTAATAACCATT -3'            |                                     |
| GFPbisulR         | 5'-AACTCCTCACCTTACTCAC-3'              |                                     |
| P27bisulF         | 5'-GAAATATGGTGAGTTATGTTGAG-3'          |                                     |
| $\gamma$ 27bisulR | 5'-AAAACAACAAACAACCCCTC-3'             |                                     |
| P35SbisulF        | 5'-ATGTTGGTTAATATGGTGGAG-3'            |                                     |
| BarbisulR         | 5'-ACCACCAACATATCCACCTC-3'             |                                     |
| PbfbisulR         | 5'-CTTTAAATCCCTAACTTCTCC-3'            |                                     |

β15bisulF

5'- GAGTAATGTATTGGTTGTGAG -3'

β15bisulR

5'- CTATTCAACAATCCTCTCTAC -3'

---

Restriction enzyme cutting sites are colored in red.
