# Supplementary material
Source: PubMed Central journal article supplement (PMC3454880)

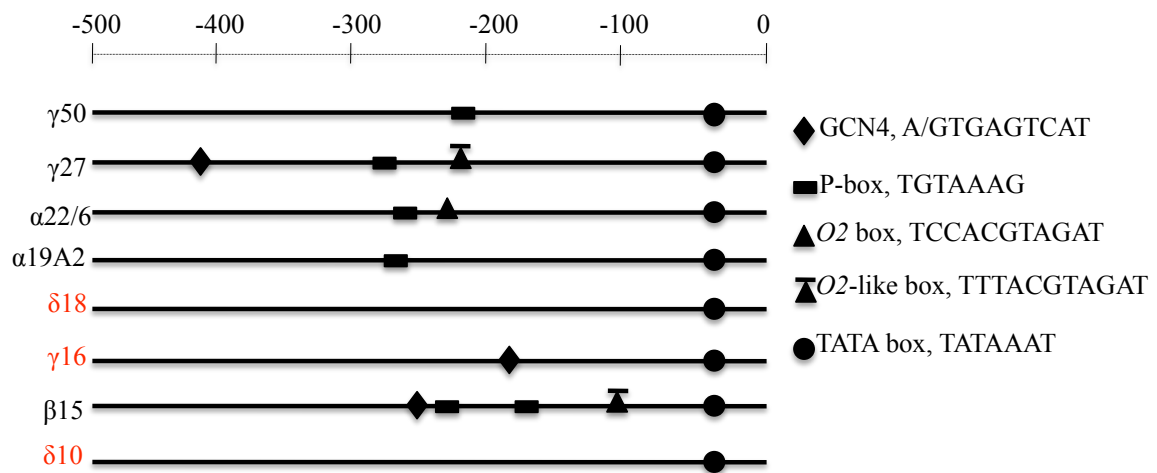

**Figure S1** Cis-elements in zein-gene promoters.

Supplement: supp_112.142372_FigureS1.pdf [file supp_112.142372_FigureS1.pdf]
